# Supplementary material for: Intercalating cation specific self-repairing of vermiculite nanofluidic membrane
Source: Royal Society of Chemistry journal article supplement (doi:10.1039/c8ta01885e), 2018-01-01
Supplement: c8ta01885e1.pdf [file c8ta01885e1.pdf]

## Supporting information

### Intercalating cation specific self-repairing of vermiculite nanofluidic membrane

Raj Kumar Gogoi and Kalyan Raidongia\*

Department of Chemistry, Indian Institute of Technology Guwahati, Guwahati, 781039, Assam, India.

\*E-mail: k.raidongia@iitg.ernet.in

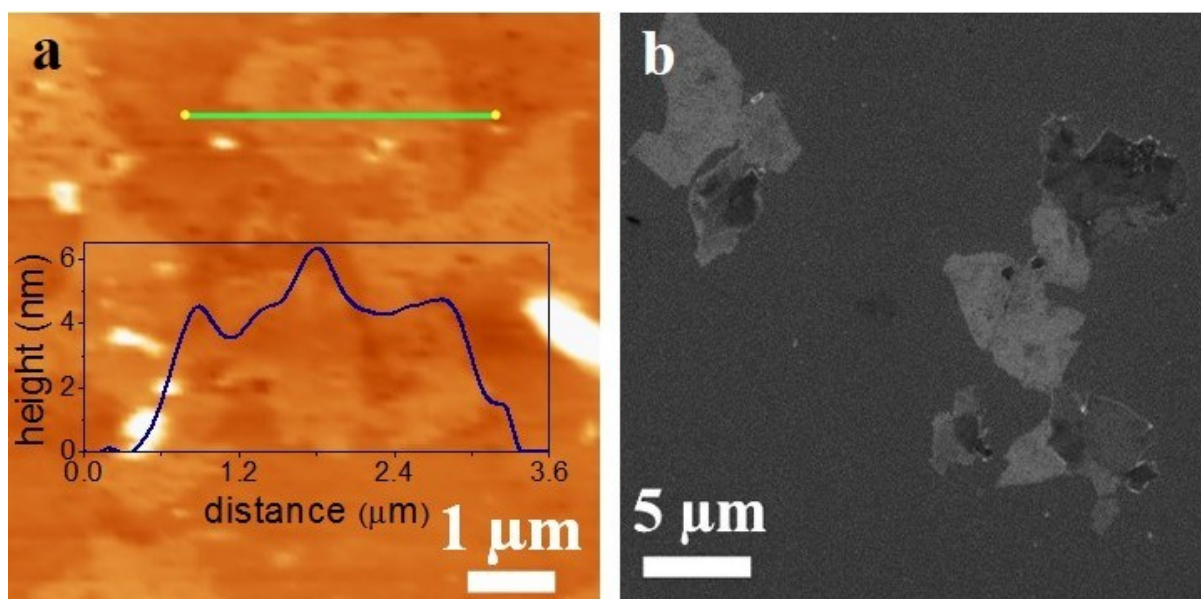

**Figure S1: Microscopic images of exfoliated vermiculite layers.** (a) AFM image with corresponding height profile (in the insert) and (b) FESEM image of exfoliated vermiculite layers.

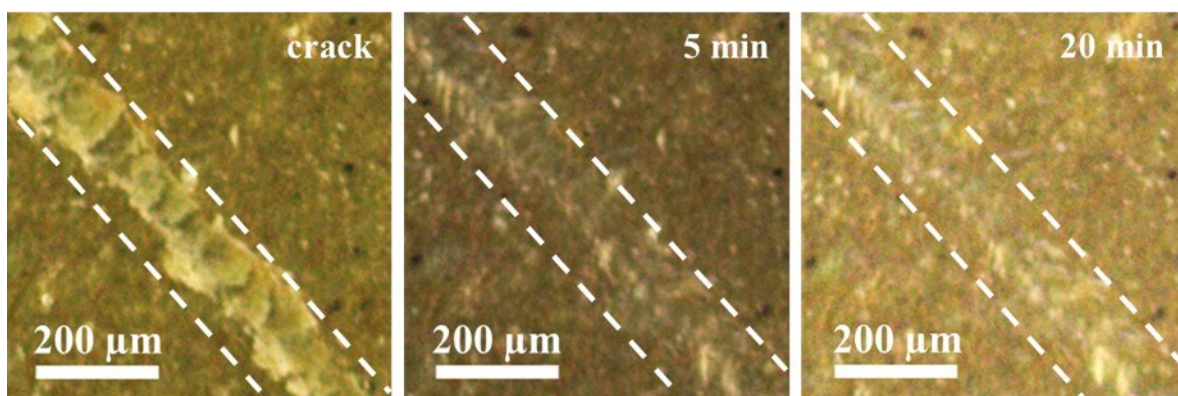

**Figure S2: Healing of Li-vermiculite membrane:** Optical microscopic images showing different stages of repairing of a sketch on the surface of Li-vermiculite membrane.

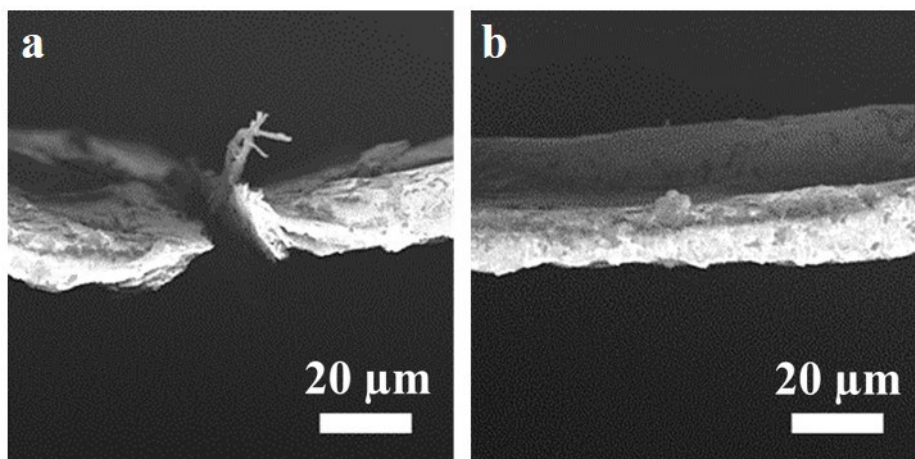

**Figure S3:** Cross-sectional FESEM images showing (a) cut and (b) repaired edge of a Li-vermiculite strip upon exposing to water droplet at room temperature.

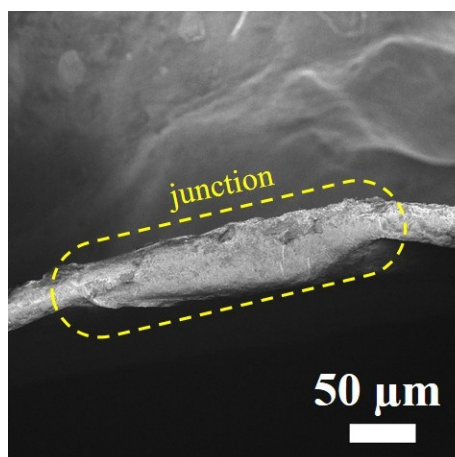

**Figure S4:** Cross-sectional FESEM image of the junction of two Li-vermiculite strips fused into a single piece by adding a water droplet (20 microliter).

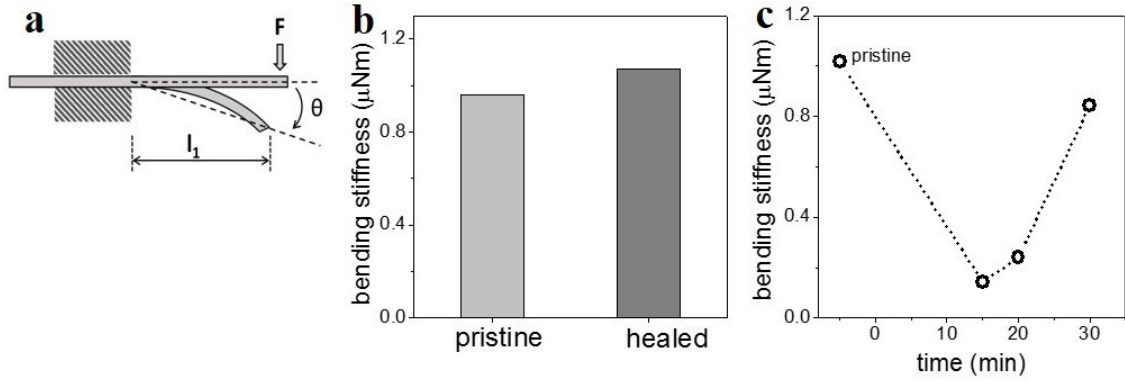

**Figure S5: Bending stiffness:** Schematic illustration of Lorentzen & Wettre two-point method bending stiffness measurement. (b) Bar diagrams comparing the bending stiffness of a pristine Li-vermiculite strip with the one healed at room temperature. (c) Plot showing time-dependent healing of bending stiffness of Li-vermiculite at 70 °C.

In Lorentzen & Wettre two-point method bending stiffness measurement method one end of the strip is clamped to a glass slide and force of known weight is applied to the other end. The bending stiffness ( $S_b$ ) was calculated using equation below

$$S_b = \frac{60 \times F \times l^2}{\pi \times \eta \times b}$$

Where, bending force ( $F$ ) = weight x gravitational constant,  $l$  = distance between the clamp and the free end,  $\theta$  = defection, and  $b$  = width of the strip. The bending stiffness of a strip (30 micron, thickness).

Time-dependent healing of the mechanical properties; After measuring bending stiffness, a pristine Li-vermiculite strips was cut into two pieces such a way that one piece remains hanging to the glass slide. The edges of the broken pieces were than placed in contact with each other (supported by a glass slide), and a droplet of water (20  $\mu\text{l}$ ) was added to the junction. The atmospheric temperature was maintained at 70 °C to facilitate faster repairing of the strips. Stiffness values were recorded at a regular interval of time by removing the support. Figure S5c shows the variation in stiffness of healing strip as function of time.

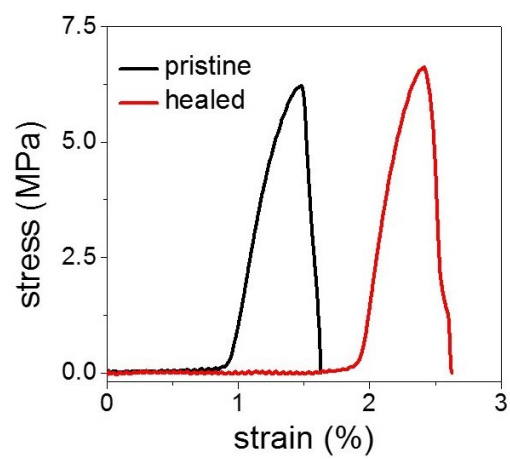

**Figure S6: Stress-stain curve.** Stress-stain curves of pristine and healed strips.

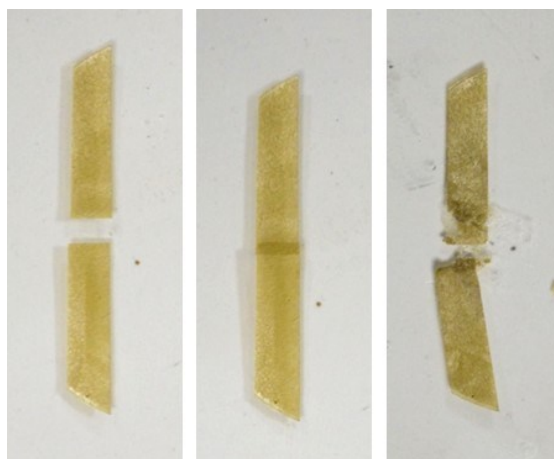

**Figure S7:** Photos showing damage of Li-vermiculite strips upon on addition of water droplet at 160 °C.



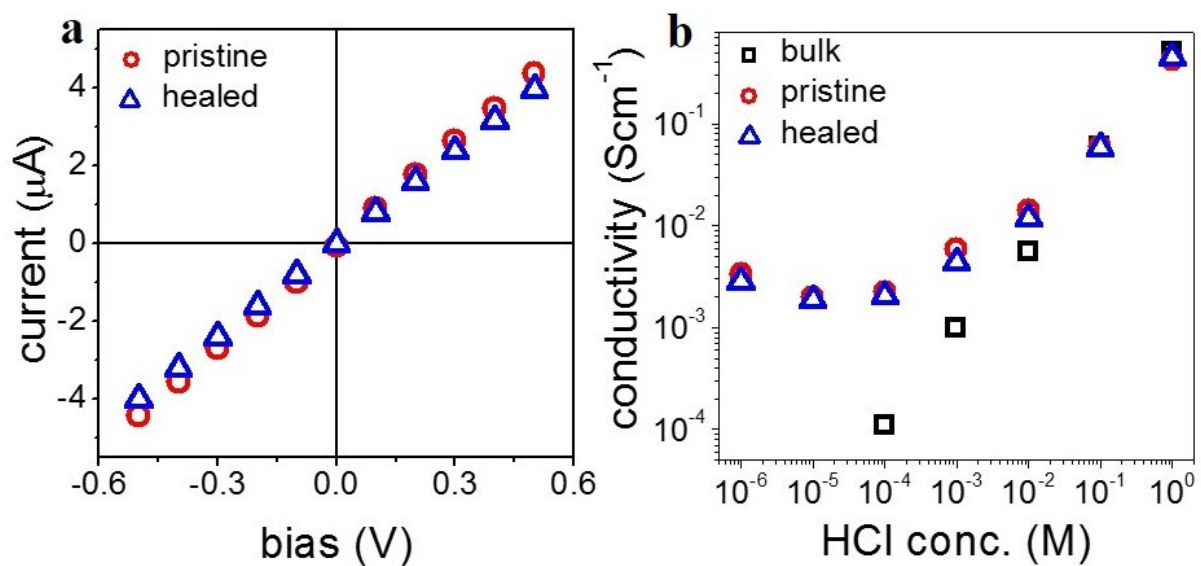

**Figure S8: Surface-charged-governed proton transport of vermiculite nanofluidic devices:** (a)  $I$ - $V$  curves of pristine and healed nanofluidic devices at  $10^{-2}$  M HCl as electrolyte. (b) Comparison of conductivity of as a function of HCl concentration of pristine and healed devices.

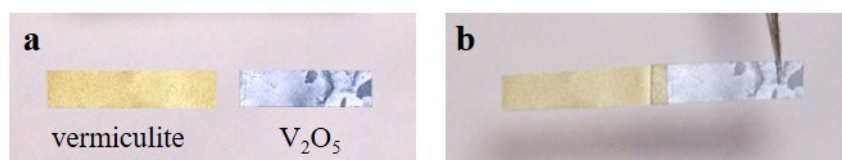

**Figure S9:** Photo of vermiculite strip fused with a strip of vanadium pentoxide lamellar membrane.

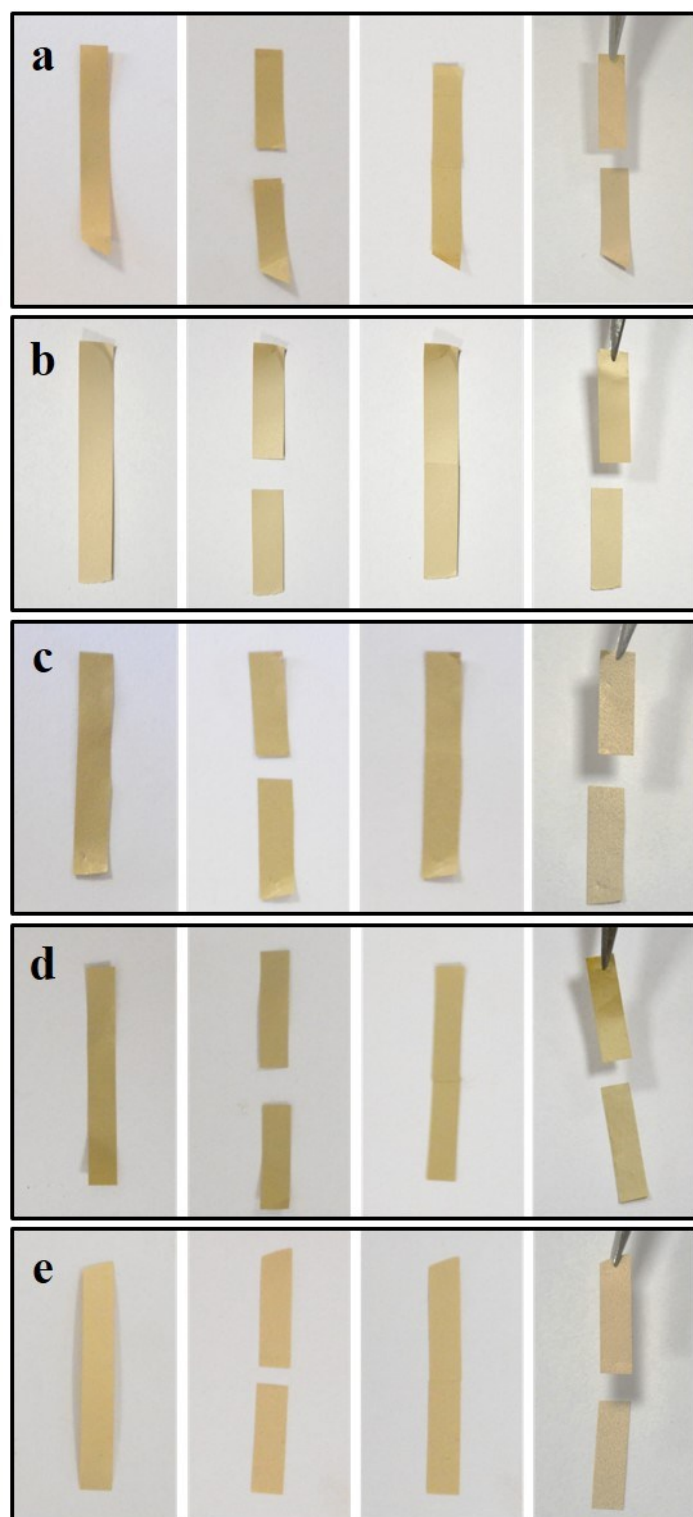

**Figure S10:** The water assisted healing process was repeated to re-connect broken strips made-up of vermiculite flakes charge balanced with (a)  $K^+$ , (b)  $Na^+$ , (c)  $Mg^{2+}$ , (d)  $Ca^{2+}$ , and (e)  $H^+$  ions. Surprising, except Li-exchanged vermiculite, none of the clay strips shown water assisted healing capability.

**Table 1: Expansion of vermiculite in presence of water.**

| <b>Samples</b>      | <b>Dry (nm)</b> | <b>Wet (nm)</b> | <b>Expansions (nm)</b> |
|---------------------|-----------------|-----------------|------------------------|
| Li-vermiculite      | 1.35            | 1.65            | 0.30                   |
| K- vermiculite      | 1.54            | 1.58            | 0.04                   |
| Na- vermiculite     | 1.08            | 1.10            | 0.02                   |
| Mg- vermiculite     | 1.51            | 1.58            | 0.07                   |
| Ba- vermiculite     | 1.53            | 1.60            | 0.07                   |
| H- vermiculite      | 1.22            | 1.30            | 0.08                   |
| Li(Ba)- vermiculite | 1.33            | 1.61            | 0.28                   |

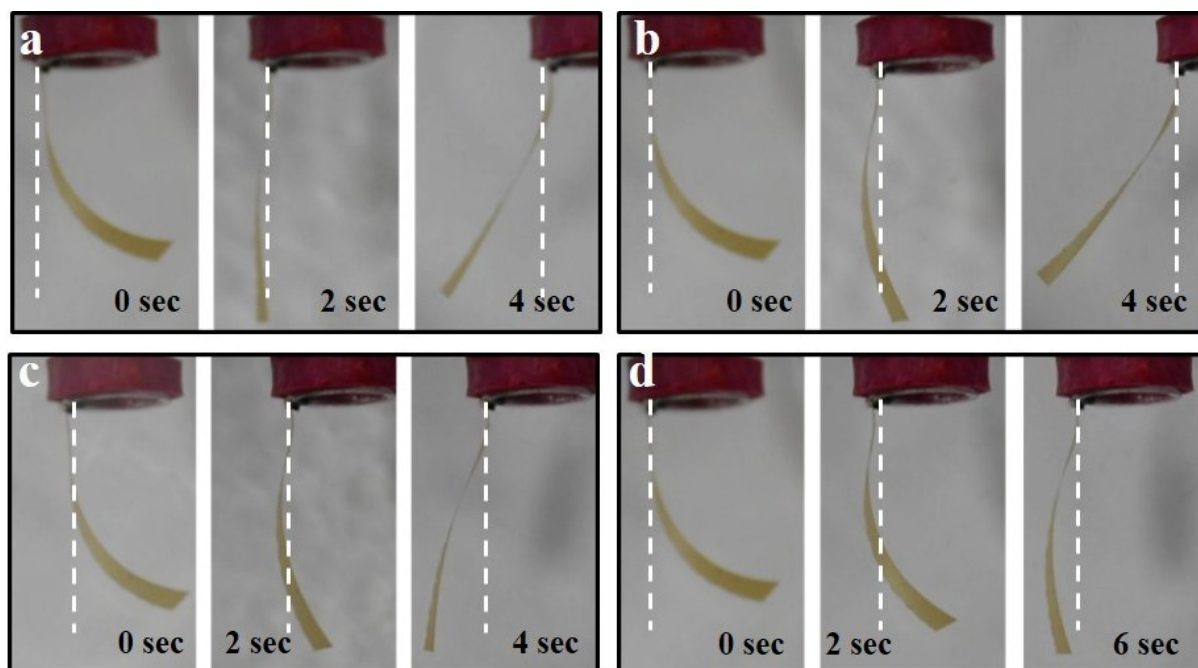

**Figure S11:** Bending movement of pristine bilayer vermiculite strip on exposure to (a) methanol, (b) ethanol, (c) THF and (d) 2-propanol vapours.

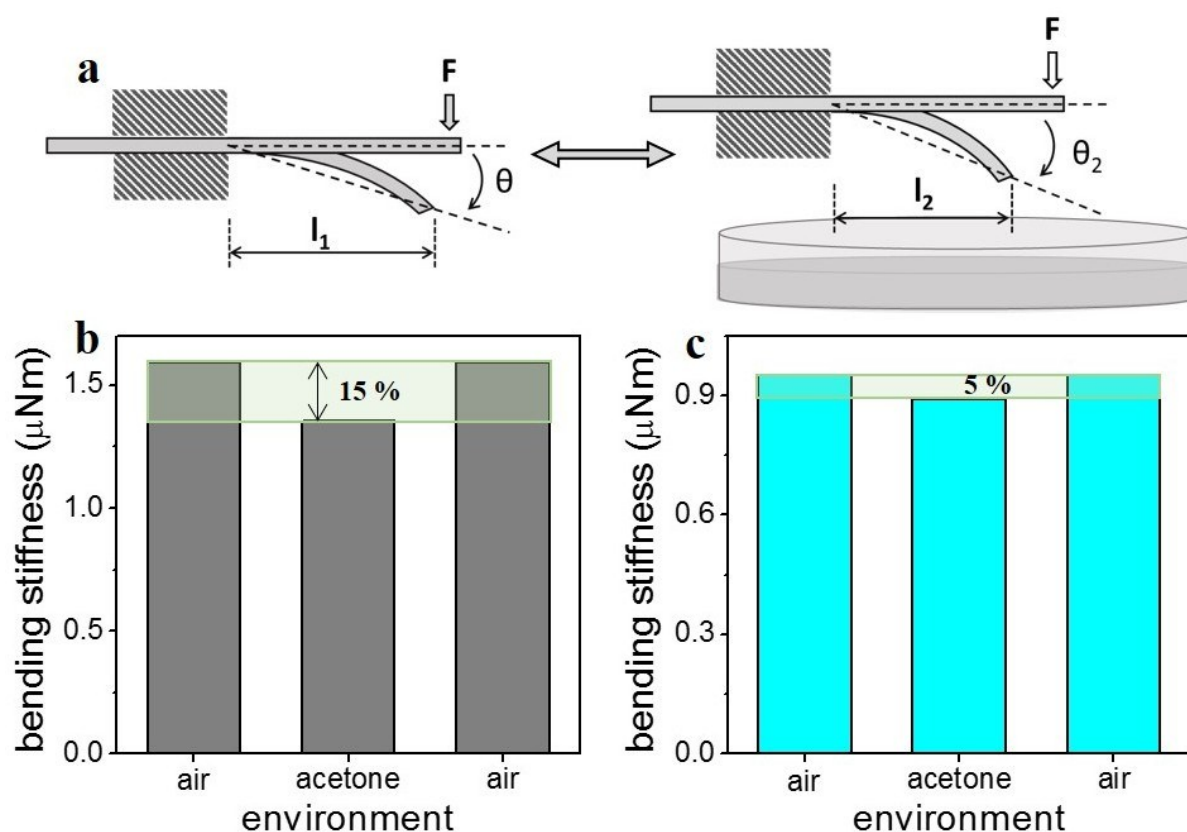

**Figure S12: Mechanism of responsiveness of vermiculite bilayer membrane.** (a) Schematic illustration of the experiment done for measuring environment dependence on bending stiffness. Bar diagrams compare the stiffness of (b) H-vermiculite and (c) Li-vermiculite in different atmospheric conditions.

Under ambient condition, the stiffness of H- and Li-exchanged strips (30 microns each) were calculated as  $1.59 \times 10^{-6}$   $\text{Nm}$  and  $9.52 \times 10^{-7}$   $\text{Nm}$ , respectively. Exposure to acetone vapors reduced the stiffness of the H-exchanged strip by 15 % and that of Li-exchanged strip by 5 %.

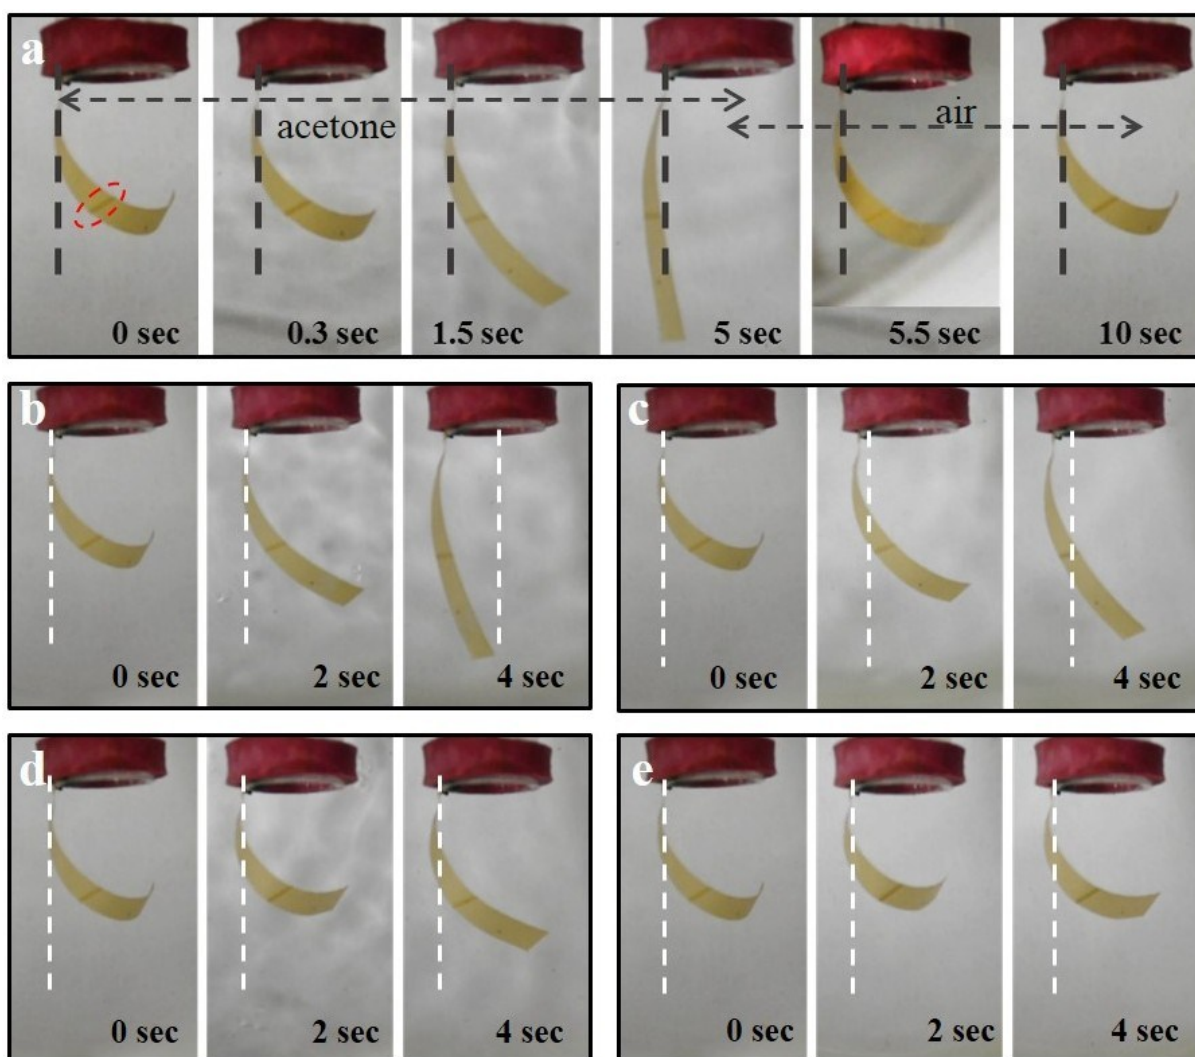

**Figure S13:** Bending movement of healed bilayer vermiculite strip upon exposure to (a) acetone (along with recovery), (b) methanol, (c) ethanol and (d) THF and (e) 2-propanol vapours.
